# Supplementary material for: Iron levels, genes involved in iron metabolism and antioxidative processes and lung cancer incidence
Source: PubMed Central journal article supplement (PMC6331102; doi:10.1371/journal.pone.0208610), 2019-01-14
Supplement: pone.0208610.s001.pdf [file pone.0208610.s001.pdf]

S1 Table. Characteristic and comparison of lung cancer patients and controls.

| Characteristic                                                   | Cases, n=200     | Controls, n=200  | p-value <sup>a</sup> |
|------------------------------------------------------------------|------------------|------------------|----------------------|
| Mean year of birth (range)                                       | 1948 (1928-1977) | 1948 (1931-1976) | 0.66                 |
| Mean age (range)                                                 | 67.94 (38-87)    | 67.62 (39-84)    | 0.67                 |
| Sex, n (%)                                                       |                  |                  |                      |
| Male                                                             | 151 (75.5)       | 151 (75.5)       | -                    |
| Female                                                           | 49 (24.5)        | 49 (24.5)        | -                    |
| Smoking                                                          |                  |                  |                      |
| Current (%)                                                      | 73 (36.5)        | 79 (39.5)        | -                    |
| Former (%)                                                       | 114 (57)         | 105 (52.5)       | -                    |
| Never, n (%)                                                     | 13 (6.5)         | 16 (8)           | -                    |
| Mean pack-years (range)                                          | 30.36 (0-110)    | 30.06 (0-150)    | 0.96                 |
| Histology, n (%)                                                 |                  |                  |                      |
| Squamous cell carcinoma                                          | 77 (38.5)        | -                | -                    |
| Adenocarcinoma                                                   | 80 (40)          | -                | -                    |
| Small cell carcinoma                                             | 7 (3.5)          | -                | -                    |
| Large cell carcinoma                                             | 6 (3)            | -                | -                    |
| Other                                                            | 22 (11)          | -                | -                    |
| Missing                                                          | 8 (4)            | -                | -                    |
| Tumour stage, n (%)                                              |                  |                  |                      |
| I                                                                | 59 (29.5)        | -                | -                    |
| II                                                               | 38 (19)          | -                | -                    |
| III                                                              | 68 (34)          | -                | -                    |
| IV                                                               | 26 (13)          | -                | -                    |
| Missing                                                          | 9 (4.5)          | -                | -                    |
| Survival, n (%)                                                  |                  |                  |                      |
| Live                                                             | 65 (32.5)        | -                | -                    |
| Dead                                                             | 135 (67.5)       | -                | -                    |
| Family cancer history in 1 <sup>st</sup> degree relatives, n (%) |                  |                  |                      |
| Lung cancer                                                      | 35 (17.5)        | 30 (15)          | -                    |
| Other cancer                                                     | 40 (20)          | 40 (20)          | -                    |

<sup>a</sup>p-value obtained using U-Mann-Whitney test
