# Supplementary material for: Iron levels, genes involved in iron metabolism and antioxidative processes and lung cancer incidence
Source: PubMed Central journal article supplement (PMC6331102; doi:10.1371/journal.pone.0208610), 2019-01-14
Supplement: pone.0208610.s002.pdf [file pone.0208610.s002.pdf]

S2 Table. Serum iron levels and iron metabolism parameters in lung cancer patients and controls.

| Group                                                          | Cases, n=200 | Controls, n=200 | p-value <sup>a</sup> |
|----------------------------------------------------------------|--------------|-----------------|----------------------|
| Mean serum iron level (µg/l)                                   |              |                 |                      |
| All                                                            | 1399.73      | 1194.66         | <b>0.01</b>          |
| Male                                                           | 1436.71      | 1223.69         | <b>0.003</b>         |
| Female                                                         | 1285.76      | 1105.21         | 0.96                 |
| Mean serum ferritin level (µg/l)                               |              |                 |                      |
| All                                                            | 260.69       | 217.82          | <b>0.007</b>         |
| Male                                                           | 284.10       | 241.30          | <b>0.007</b>         |
| Female                                                         | 188.56       | 145.47          | 0.38                 |
| Mean serum UIBC level (µg/l)                                   |              |                 |                      |
| All                                                            | 2004.09      | 1976.19         | 0.47                 |
| Male                                                           | 1921.56      | 1945.26         | 0.28                 |
| Female                                                         | 2258.43      | 2071.49         | 0.90                 |
| Mean serum TIBC level (µg/l) <sup>b</sup>                      |              |                 |                      |
| All                                                            | 3403,82      | 3170,85         | <b>0.006</b>         |
| Male                                                           | 3358,27      | 3168,95         | <b>0.003</b>         |
| Female                                                         | 3544,19      | 3176,70         | 0.73                 |
| Mean serum transferrin saturation level (TfS) (%) <sup>b</sup> |              |                 |                      |
| All                                                            | 40.32        | 38.88           | 0.13                 |
| Male                                                           | 41.95        | 40.10           | 0.06                 |
| Female                                                         | 35.29        | 35.15           | 0.68                 |

<sup>a</sup> p-value obtained using U-Mann-Whitney test

<sup>b</sup> values calculated from formulas: TIBC=UIBC+serum iron; TfS=serum iron/TIBC\*100%
