# Supplementary material for: Iron levels, genes involved in iron metabolism and antioxidative processes and lung cancer incidence
Source: PubMed Central journal article supplement (PMC6331102; doi:10.1371/journal.pone.0208610), 2019-01-14
Supplement: pone.0208610.s003.pdf [file pone.0208610.s003.pdf]

S3 Table. Probability of lung cancer depending on iron concentration.

| Quartile  | Iron concentration<br>( $\mu\text{g/l}$ ) | Cases, n=200<br>(%) | Controls,<br>n=200 (%) | OR <sub>uni</sub> (95%CI) <sup>a</sup> | p-value     | OR <sub>multi</sub> (95%CI) <sup>b</sup> | p-value     |
|-----------|-------------------------------------------|---------------------|------------------------|----------------------------------------|-------------|------------------------------------------|-------------|
| I         | <942.90                                   | 47 (23.5)           | 53 (26.5)              | 1                                      | -           | 1                                        | -           |
| II        | 942.91-1203.83                            | 43 (21.5)           | 57 (28.5)              | 0.91 (0.48 - 1.71)                     | 0.77        | 0.73 (0.36-1.45)                         | 0.37        |
| III       | 1203.84-1496.57                           | 43 (21.5)           | 57 (28.5)              | 0.92 (0.50 - 1.70)                     | 0.80        | 0.76 (0.39 - 1.48)                       | 0.42        |
| <b>IV</b> | <b>&gt;1497</b>                           | <b>67 (33.5)</b>    | <b>33 (16.5)</b>       | <b>2.38 (1.26 – 4.51)</b>              | <b>0.01</b> | <b>2.24 (1.12 – 4.46)</b>                | <b>0.02</b> |

<sup>a</sup>OR<sub>uni</sub> univariable conditional logistic regression

<sup>b</sup>OR<sub>multi</sub> multivariable conditional logistic regression (adjusted for seven tested SNP's).
