# Supplementary material for: Iron levels, genes involved in iron metabolism and antioxidative processes and lung cancer incidence
Source: PubMed Central journal article supplement (PMC6331102; doi:10.1371/journal.pone.0208610), 2019-01-14
Supplement: pone.0208610.s004.pdf [file pone.0208610.s004.pdf]

S4 Table. Iron metabolism parameters in lung cancer cases and controls.

| Quartile        | Concentration      | Cases,<br>n=200<br>(%) | Controls,<br>n=200<br>(%) | OR <sub>uni</sub> (95% CI) <sup>a</sup> | p-value         | OR <sub>multi</sub> (95% CI) <sup>b</sup> | p-value     |
|-----------------|--------------------|------------------------|---------------------------|-----------------------------------------|-----------------|-------------------------------------------|-------------|
| Ferritin (µg/l) |                    |                        |                           |                                         |                 |                                           |             |
| I               | <107.68            | 45 (22.5)              | 55 (27.5)                 | 1                                       | -               | 1                                         | -           |
| II              | 107.68-185.55      | 45 (22.5)              | 55 (27.5)                 | 1.06 (0.59 - 1.89)                      | 0.85            | 1.01 (0.55-1.87)                          | 0.77        |
| III             | 185.55-301.27      | 45 (22.5)              | 55 (27.5)                 | 1.10 (0.61 - 1.98)                      | 0.75            | 1.06 (0.57 - 1.94)                        | 0.80        |
| IV              | <b>&gt;301.27</b>  | <b>65 (32.5)</b>       | <b>35 (17.5)</b>          | <b>2.65 (1.39 – 5.03)</b>               | <b>&lt;0.01</b> | <b>2.33 (1.19 – 4.55)</b>                 | <b>0.01</b> |
| UIBC (µg/l)     |                    |                        |                           |                                         |                 |                                           |             |
| I               | <1598.25           | 44 (22)                | 56 (28)                   | 1                                       | -               | 1                                         | -           |
| II              | 1598.25-1937.50    | 55 (27.5)              | 45(22.5)                  | 1.58 (0.90 - 2.80)                      | 0.12            | 1.74 (0.95 - 3.18)                        | 0.07        |
| III             | 1937.50-2249.75    | 50 (25)                | 50 (25)                   | 1.26 (0.73 - 2.19)                      | 0.41            | 1.36 (0.76 - 2.44)                        | 0.29        |
| IV              | >2249.75           | 51 (25.5)              | 49 (24.5)                 | 1.36 (0.76 - 2.43)                      | 0.29            | 1.46 (0.79 - 2.72)                        | 0.23        |
| TIBC (µg/l)     |                    |                        |                           |                                         |                 |                                           |             |
| I               | <2758.13           | 40 (20)                | 60 (30)                   | 1                                       | -               | 1                                         | -           |
| II              | 2758.13-3143.05    | 52 (26)                | 48 (24)                   | 1.62 (0.93-2.80)                        | 0.09            | 1.65 (0.92-2.94)                          | 0.09        |
| III             | 3143.05-3587.47    | 47 (23.5)              | 53 (26.5)                 | 1.29 (0.76-2.20)                        | 0.35            | 1.19 (0.68-2.06)                          | 0.55        |
| IV              | <b>&gt;3587.47</b> | <b>61 (30.5)</b>       | <b>41 (20.5)</b>          | <b>2.32 (1.31-4.11)</b>                 | <b>0.01</b>     | 1.67 (0.87-3.21)                          | 0.13        |
| TfS (%)         |                    |                        |                           |                                         |                 |                                           |             |
| I               | <31.35             | 49 (24.5)              | 51 (25.5)                 | 1                                       | -               | 1                                         | -           |
| II              | 31.35-38.70        | 43 (21.5)              | 57 (28.5)                 | 0.79 (0.45 - 1.40)                      | 0.42            | 0.79 (0.42-1.50)                          | 0.47        |
| III             | 38.70-46.43        | 49 (24.5)              | 51 (25.5)                 | 1.05 (0.58 - 1.90)                      | 0.87            | 0.86 (0.41 – 1.82)                        | 0.70        |
| IV              | >46.43             | 59 (29.5)              | 41 (20.5)                 | 1.61 (0.88 – 2.96)                      | 0.12            | 0.90 (0.39 – 2.07)                        | 0.81        |

<sup>a</sup>OR<sub>uni</sub> univariable conditional logistic regression

<sup>b</sup>OR<sub>multi</sub> multivariable conditional logistic regression (adjusted for iron concentration).
