# Supplementary material for: Iron levels, genes involved in iron metabolism and antioxidative processes and lung cancer incidence
Source: PubMed Central journal article supplement (PMC6331102; doi:10.1371/journal.pone.0208610), 2019-01-14
Supplement: pone.0208610.s005.pdf [file pone.0208610.s005.pdf]

S5 Table. Correlation of stage with iron level and iron parameters

| Value                   | Iron           | Ferritin        | TIBC | UIBC | TfS             |
|-------------------------|----------------|-----------------|------|------|-----------------|
| Correlation coefficient | -0.12          | <b>0.18</b>     | 0.01 | 0.12 | <b>-0.14</b>    |
| Significance*           | 0.35           | <b>0.01</b>     | 0.83 | 0.13 | <b>0.02</b>     |
|                         |                |                 |      |      |                 |
| Stage                   | Significance** |                 |      |      |                 |
| 1 vs. 2                 | 0.07           | 0.36            | 0.48 | 0.10 | <b>&lt;0.01</b> |
| 1 vs. 3                 | 0.08           | <b>&lt;0.01</b> | 0.80 | 0.12 | <b>0.03</b>     |
| 1 vs. 4                 | 0.27           | 0.29            | 0.69 | 0.06 | <b>0.04</b>     |
| 2 vs. 3                 | 0.64           | 0.15            | 0.41 | 0.06 | 0.08            |
| 2 vs. 4                 | 0.56           | 0.64            | 0.89 | 0.51 | 0.55            |
| 3 vs. 4                 | 0.74           | 0.46            | 0.64 | 0.42 | 0.44            |

\* Spearman correlation analysis; \*\* Mann-Whitney test
