# Supplementary material for: Iron levels, genes involved in iron metabolism and antioxidative processes and lung cancer incidence
Source: PubMed Central journal article supplement (PMC6331102; doi:10.1371/journal.pone.0208610), 2019-01-14
Supplement: pone.0208610.s006.pdf [file pone.0208610.s006.pdf]

S6 Table. The survival analysis of lung cancer cases depending on iron level and iron metabolism parameters.

| Quartile        | Concentration          | HR (95%CI)              | p-value     |
|-----------------|------------------------|-------------------------|-------------|
| Fe (µg/l)       |                        |                         |             |
| I               | <959.92                | 1                       | -           |
| II              | 960.86-1298.54         | 0.90 (0.54 - 1.49)      | 0.68        |
| III             | 1305.96-1619.46        | 0.81 (0.48 - 1.37)      | 0.44        |
| IV              | >1628.62               | 0.60 (0.35 – 1.04)      | 0.07        |
| Ferritin (µg/l) |                        |                         |             |
| I               | <113.5                 | 1                       | -           |
| II              | 114.2-212.6            | 1.76 (1.01 – 3.06)      | 0.05        |
| III             | 214-334.4              | 1.19 (0.68 – 2.09)      | 0.54        |
| IV              | >334.9                 | 1.07 (0.61 – 1.88)      | 0.80        |
| UIBC (µg/l)     |                        |                         |             |
| I               | <1628                  | 1                       | -           |
| II              | 1637-1929              | 0.57 (0.33 – 0.98)      | 0.05        |
| III             | 1936-2248              | 0.74 (0.44 – 1.24)      | 0.25        |
| IV              | >2265                  | 0.92 (0.54 – 1.55)      | 0.74        |
| TIBC (µg/l)     |                        |                         |             |
| I               | <2839.8                | 1                       | -           |
| <b>II</b>       | <b>2863.93-3176.28</b> | <b>0.51 (0.30-0.85)</b> | <b>0.01</b> |
| III             | 3180.84-3708.95        | 0.61 (0.37-1.02)        | 0.06        |
| IV              | >3733.42               | 0.63 (0.38-1.05)        | 0.08        |
| TfS (%)         |                        |                         |             |

|     |                |                           |             |
|-----|----------------|---------------------------|-------------|
| I   | <31.71         | 1                         | -           |
| II  | 32.02-40.03    | 1.15 (0.67 - 1.85)        | 0.67        |
| III | 40.73-48.2     | 1.05 (0.62 - 1.76)        | 0.86        |
| IV  | > <b>48.67</b> | <b>0.55 (0.31 – 0.97)</b> | <b>0.04</b> |
