# Supplementary material for: Iron levels, genes involved in iron metabolism and antioxidative processes and lung cancer incidence
Source: PubMed Central journal article supplement (PMC6331102; doi:10.1371/journal.pone.0208610), 2019-01-14
Supplement: pone.0208610.s007.pdf [file pone.0208610.s007.pdf]

S7 Table. Genotype frequency in 7 analyzed genes and lung cancer risk

| Genotypes                 | Cases,<br>n=200<br>(%) | Controls<br>, n=200<br>(%) | OR <sub>uni</sub> (95%CI) <sup>a</sup> | p-value     | OR <sub>multi</sub> (95%CI) <sup>b</sup> | p-value |
|---------------------------|------------------------|----------------------------|----------------------------------------|-------------|------------------------------------------|---------|
| rs1049296 in <i>TF</i>    |                        |                            |                                        |             |                                          |         |
| CC                        | 138(69)                | 138(69)                    | 1                                      | -           | 1                                        | -       |
| CT                        | 55(27.5)               | 56(28)                     | 0.98 (0.63-1.54)                       | 0.94        | 0.88 (0.55 - 1.42)                       | 0.61    |
| TT                        | 7(3.5)                 | 6(3)                       | 1.19 (0.36-3.95)                       | 0.77        | 1.15 (0.34 - 3.95)                       | 0.82    |
| rs3817672 in <i>TFRI</i>  |                        |                            |                                        |             |                                          |         |
| TT                        | 53(26.5)               | 64(32)                     | 1                                      | -           | 1                                        | -       |
| TC                        | 102(51)                | 106(53)                    | 1.14 (0.74- 1.75)                      | 0.56        | 1.08 (0.69 - 1.69)                       | 0.75    |
| CC                        | 45(22.5)               | 30(15)                     | 1.76 (0.99- 3.13)                      | 0.06        | 1.74 (0.96 - 3.18)                       | 0.07    |
| rs1799945 in <i>HFE</i>   |                        |                            |                                        |             |                                          |         |
| CC                        | 152(76)                | 148(74)                    | 1                                      | -           | 1                                        | -       |
| CG                        | 45(22.5)               | 49(24.5)                   | 0.89 (0.55-1.43)                       | 0.63        | 0.8 (0.48 - 1.34)                        | 0.40    |
| GG                        | 3(1.5)                 | 3(1.5)                     | 0.92 (0.18-4.73)                       | 0.92        | 0.43 (0.08 - 2.46)                       | 0.35    |
| rs10421768 in <i>HAMP</i> |                        |                            |                                        |             |                                          |         |
| AA                        | 105(52.5<br>)          | 125(62.<br>5)              | 1                                      | -           | 1                                        | -       |
| AG                        | 81(40.5)               | 69(34.5)                   | 1.34 (0.90-2.00)                       | 0.15        | 1.33 (0.87 - 2.03)                       | 0.18    |
| GG                        | 14(7)                  | 6(3)                       | <b>2.83 (1.00-8.01)</b>                | <b>0.05</b> | 2.90 (0.97 - 8.64)                       | 0.06    |
| rs1050450 in <i>GPXI</i>  |                        |                            |                                        |             |                                          |         |
| CC                        | 108(54)                | 100(50)                    | 1                                      | -           | 1                                        | -       |
| CT                        | 80(40)                 | 92(46)                     | 0.79 (0.52-1.21)                       | 0.27        | 0.78 (0.5 - 1.21)                        | 0.26    |
| TT                        | 12(6)                  | 8(4)                       | 1.50 (0.54-4.21)                       | 0.44        | 1.54 (0.52 - 4.59)                       | 0.44    |

| rs1001179 in <i>CAT</i> |          |           |                  |      |                    |      |
|-------------------------|----------|-----------|------------------|------|--------------------|------|
| CC                      | 110(55)  | 115(57.5) | 1                | -    | 1                  | -    |
| CT                      | 77(38.5) | 77(38.5)  | 1.06 (0.69-1.63) | 0.78 | 1.14 (0.73 - 1.78) | 0.56 |
| TT                      | 13(6.5)  | 8(4)      | 1.68 (0.68-4.17) | 0.26 | 1.64 (0.64 - 4.23) | 0.31 |
| rs4880 in <i>SOD2</i>   |          |           |                  |      |                    |      |
| AA                      | 50(25)   | 47(23.5)  | 1                | -    | 1                  | -    |
| AG                      | 95(47.5) | 106(53)   | 0.83 (0.51-1.36) | 0.47 | 0.82 (0.49 - 1.36) | 0.43 |
| GG                      | 55(27.5) | 47(23.5)  | 1.09 (0.64-1.88) | 0.75 | 1.07 (0.61 - 1.89) | 0.81 |

<sup>a</sup>OR<sub>uni</sub> univariable conditional logistic regression

<sup>b</sup>OR<sub>multi</sub> multivariable conditional logistic regression (adjusted for iron concentration).
