# Supplementary material for: Iron levels, genes involved in iron metabolism and antioxidative processes and lung cancer incidence
Source: PubMed Central journal article supplement (PMC6331102; doi:10.1371/journal.pone.0208610), 2019-01-14

S4 Fig. Kaplan-Meier curves of 8-years survival depending on TIBC

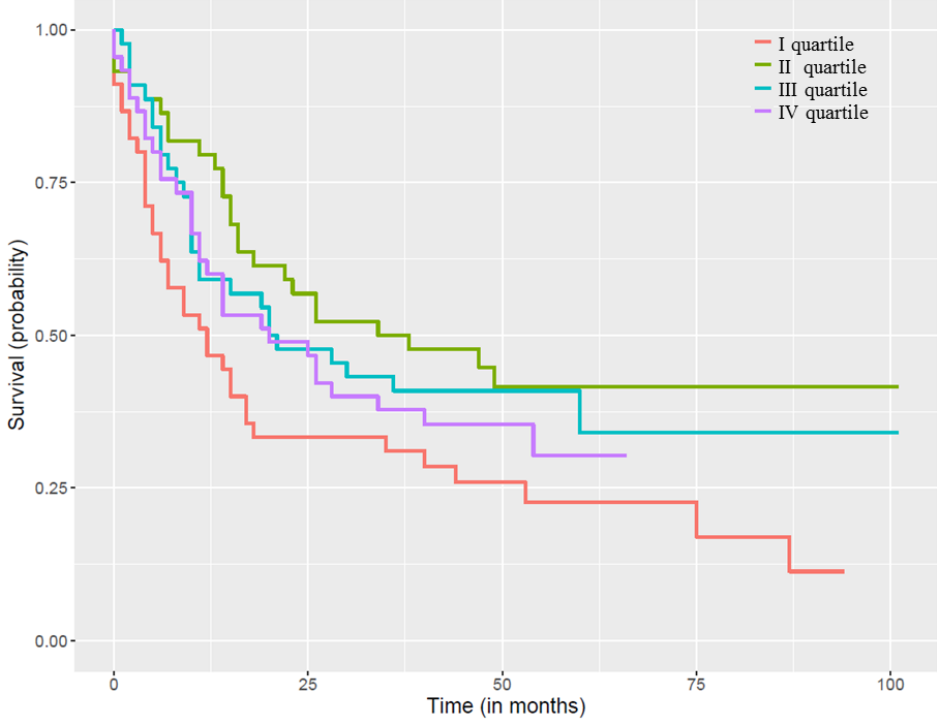

Supplement: pone.0208610.s011.pdf [file pone.0208610.s011.pdf]
