# Supplementary material for: Iron levels, genes involved in iron metabolism and antioxidative processes and lung cancer incidence
Source: PubMed Central journal article supplement (PMC6331102; doi:10.1371/journal.pone.0208610), 2019-01-14

S5 Fig. Kaplan-Meier curves of 8-years survival depending on **transferrin saturation**

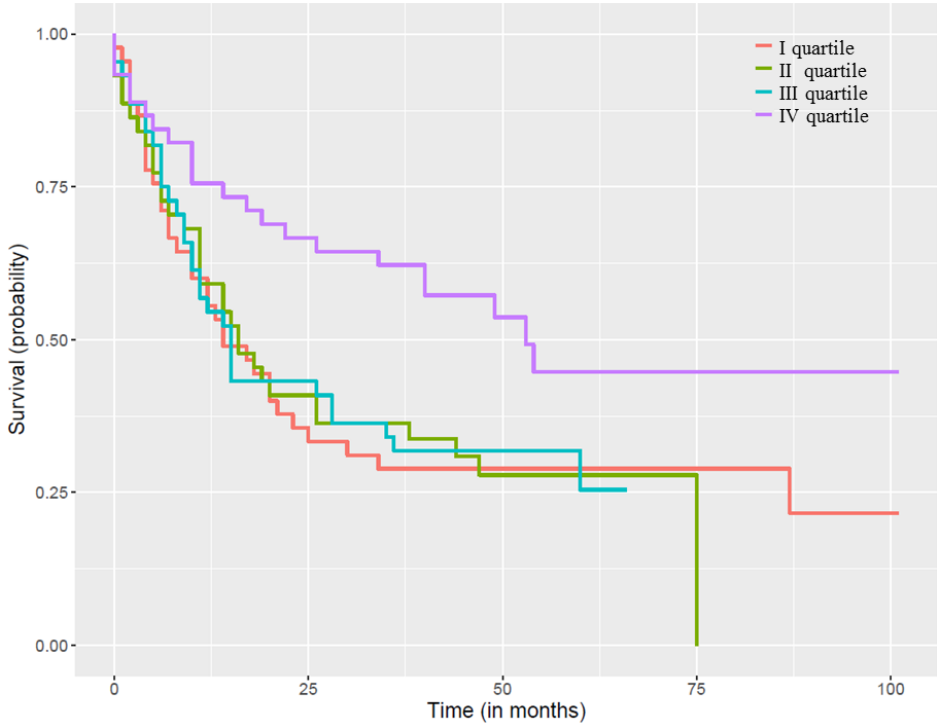

Supplement: pone.0208610.s012.pdf [file pone.0208610.s012.pdf]
